# Supplementary material for: A self-powered triboelectric microfluidic system for liquid sensing
Source: Royal Society of Chemistry journal article supplement (doi:10.1039/c8ta04546a), 2018-01-01

## Supplementary information

### Self-powered triboelectric microfluidic system for liquid sensing

Wook Kim,<sup>‡a</sup> Daehwan Choi,<sup>‡b</sup> Jang-Yeon Kwon,<sup>\*b</sup> and Dukhyun Choi<sup>\*ab</sup>

a. Department of Mechanical Engineering, College of Engineering, Kyung Hee University, 1732, Deogyong-daero, Giheung, Yongin, Gyeonggi, 17104, Republic of Korea

b. School of Integrated Technology, Yonsei University, 162-1, Songdo-dong Yeonsu-gu, Incheon, 406-840, Republic of Korea

\* Corresponding authors: dchoi@khu.ac.kr (Dukhyun Choi), jangyeon@yonsei.ac.kr (Jang-Yeon Kwon)

‡ These authors equally contributed to this work.

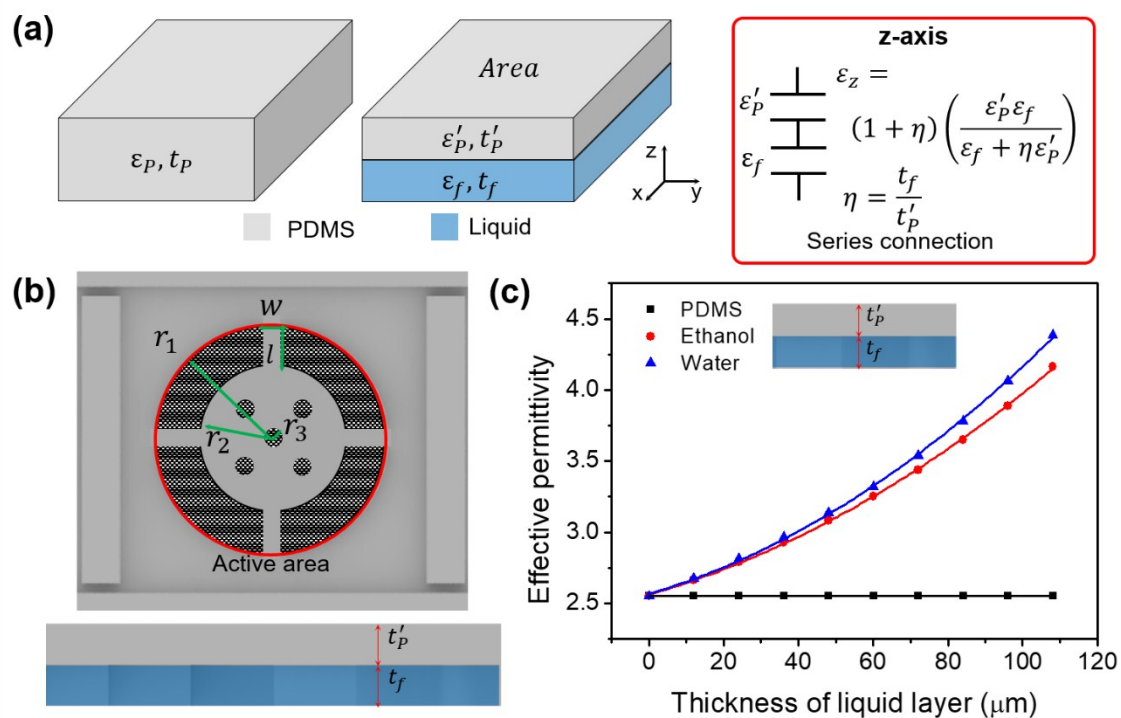

**Figure S1.** Calculation of effective permittivity. (a) Schematic of PDMS-fluid composite layer and connection types of permittivity. (b) Geometrical parameters to calculate effective thickness of PDMS layer. (c) Theoretical effective permittivity with various thickness of liquid layer.

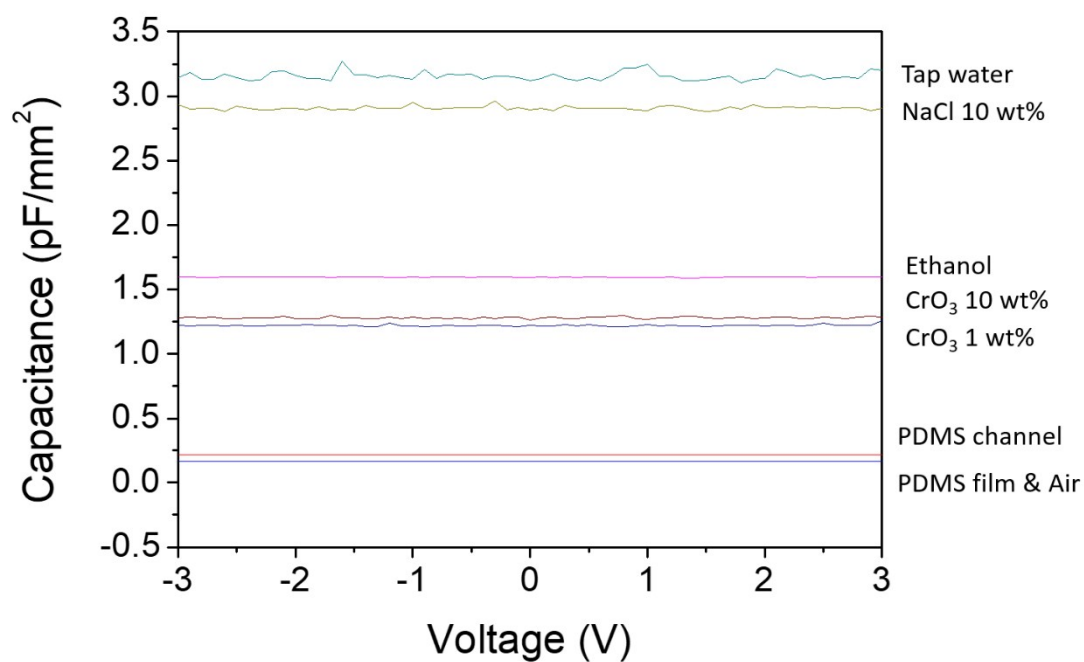

**Figure S2.** Measured capacitance of M-TENS with various liquids in microfluidic channel.

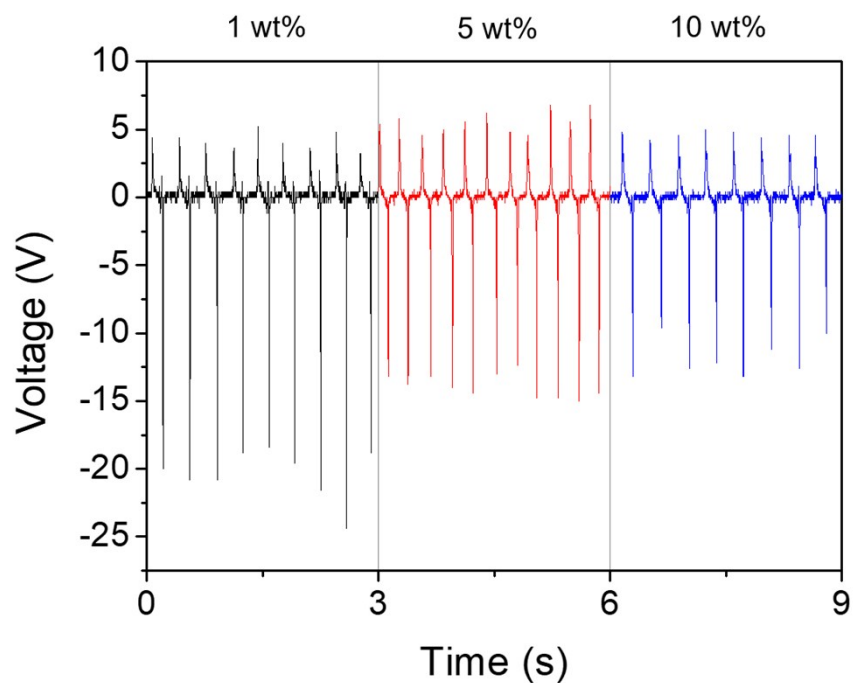

**Figure S3.** Measured voltage signals from different concentration of  $\text{CrO}_3$  with finger driven M-TENS based on single electrode mode.

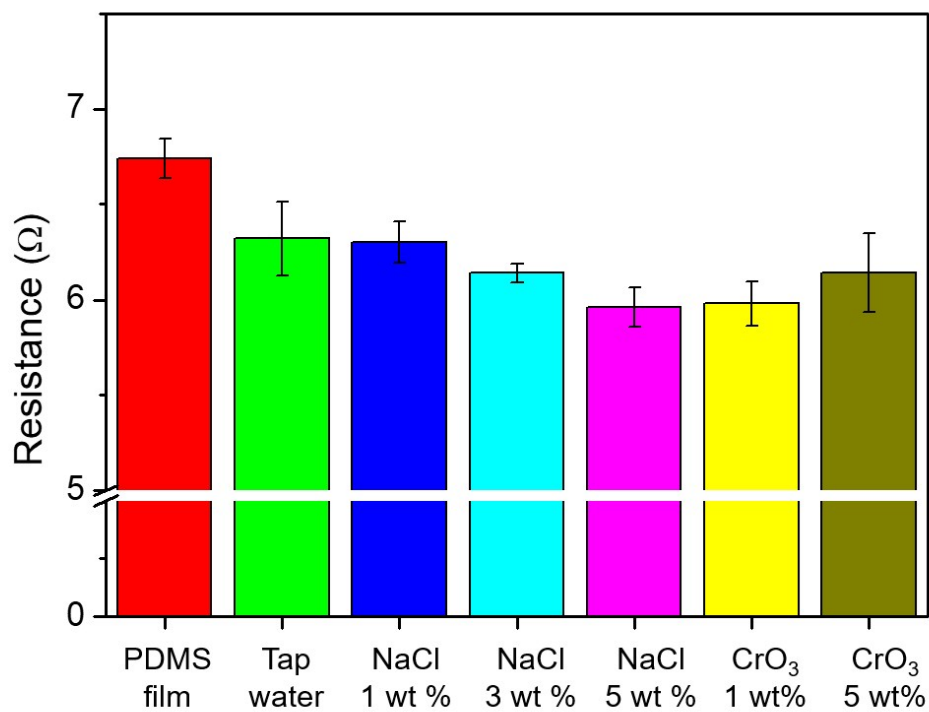

Supplement: c8ta04546a1.pdf [file c8ta04546a1.pdf]
